# Supplementary material for: Orbital transitions: insight into energy transfer through an antenna for an organo-lanthanide complex
Source: Royal Society of Chemistry journal article supplement (doi:10.1039/d1cc05246b), 2021-01-01
Supplement: d1cc05246b1.pdf [file d1cc05246b1.pdf]

## Orbital transitions: insight to energy transfer through an antenna for a organo-lanthanide complex

Waygen Thor<sup>†</sup>, Yonghong Zhang<sup>†‡</sup>, Ka-Leung Wong<sup>†\*</sup>, Peter A. Tanner<sup>†\*</sup>

<sup>†</sup>Department of Chemistry, Hong Kong Baptist University, Waterloo Road, Kowloon Tong, Hong Kong S.A.R. and <sup>‡</sup>State Key Laboratory of Chemistry and Utilization of Carbon Based Energy Resources, Key Laboratory of Oil and Gas Fine Chemicals, Ministry of Education & Xinjiang Uygur Autonomous Region, Urumqi Key Laboratory of Green Catalysis and Synthesis Technology, College of Chemistry, Xinjiang University, Urumqi 830046, Xinjiang, PR China.

### Table of Contents

#### Part I. Instrumentation

|          | Title                          | Page,<br>S |
|----------|--------------------------------|------------|
| <b>A</b> | <b>Materials</b>               | 3          |
| <b>B</b> | <b>Syntheses of Complexes</b>  | 3          |
| <b>C</b> | <b>Instruments</b>             | 3          |
| <b>D</b> | <b>Calculations (Table S1)</b> | 3,4        |

#### Part II. Results

|           | Title                                                                             | Page,<br>S |
|-----------|-----------------------------------------------------------------------------------|------------|
| <b>1</b>  | <b>Optimization</b>                                                               |            |
| Table S2  | Normal mode calculations of optimized complexes.                                  | 4          |
| Figure S1 | The overlaid optimized structures of complexes in gas phase and in solution.      | 4          |
| <b>2</b>  | <b>Frontier orbitals representations of complexes with different functionals.</b> |            |
| Figure S2 | <b>Euphen</b> in gas phase.                                                       | 5          |
| Table S3  | Frontier energy gap of <b>Euphen</b> in gas phase.                                | 6          |
| Figure S3 | <b>Euphen</b> in MeOH.                                                            | 7          |
| Table S4  | Frontier energy gap of <b>Euphen</b> in MeOH.                                     | 8          |
| Figure S4 | <b>EuTTA</b> in gas phase.                                                        | 8          |
| Table S5  | Frontier energy gap of <b>EuTTA</b> in gas phase.                                 | 9          |
| Figure S5 | <b>EuTTA</b> in MeOH.                                                             | 9          |
| Table S6  | Frontier energy gap of <b>EuTTA</b> in MeOH.                                      | 10         |
| <b>3</b>  | <b>Frontier orbitals representations of complexes with different basis sets.</b>  |            |
| Figure S6 | Comparison of complexes with different basis sets.                                | 10         |
| <b>4</b>  | <b>TDDFT</b>                                                                      |            |
| Figure S7 | Comparison of experimental and calculated absorption spectra.                     | 11         |
| Figure S8 | Selected orbital transitions for <b>Euphen</b> in gas phase using PBE0.           | 11         |

|            |                                                                                       |    |
|------------|---------------------------------------------------------------------------------------|----|
| Table S7   | Selected calculated absorption properties for <b>Euphen</b> in gas phase using PBE0.  | 12 |
| Figure S9  | Selected orbital transitions for <b>Euphen</b> in gas phase using M062X.              | 12 |
| Table S8   | Selected calculated absorption properties for <b>Euphen</b> in gas phase using M062X. | 12 |
| Figure S10 | Selected orbital transitions for <b>EuTTA</b> in gas phase using PBE0.                | 13 |
| Table S9   | Selected calculated absorption properties for <b>EuTTA</b> in gas phase using PBE0.   | 13 |
| Figure S11 | Selected orbital transitions for <b>EuTTA</b> in gas phase using M062X.               | 14 |
| Table S10  | Selected calculated absorption properties for <b>EuTTA</b> in gas phase using M062X.  | 14 |
| Figure S12 | Selected orbital transitions for <b>Euphen</b> in MeOH using PBE0.                    | 15 |
| Table S11  | Selected calculated absorption properties for <b>Euphen</b> in MeOH using PBE0.       | 15 |
| Figure S13 | Selected orbital transitions for <b>Euphen</b> in MeOH using M062X.                   | 16 |
| Table S12  | Selected calculated absorption properties for <b>Euphen</b> in MeOH using M062X.      | 16 |
| Figure S14 | Selected orbital transitions for <b>EuTTA</b> in MeOH using PBE0.                     | 17 |
| Table S13  | Selected calculated absorption properties for <b>EuTTA</b> in MeOH using PBE0.        | 17 |
| Figure S15 | Selected orbital transitions for <b>EuTTA</b> in MeOH using M062X.                    | 18 |
| Table S14  | Selected calculated absorption properties for <b>EuTTA</b> in MeOH using M062X.       | 18 |
| <b>5</b>   | <b>CASSCF/NEVPT2</b>                                                                  |    |
| Figure S16 | Comparison of experimental and calculated absorption spectra in solution phase.       | 19 |
| Figure S17 | Converged active space of <b>Euphen</b> in gas phase.                                 | 19 |
| Table S15  | Selected calculated absorption properties for <b>Euphen</b> in gas phase.             | 19 |
| Figure S18 | Converged active space of <b>EuTTA</b> in gas phase.                                  | 20 |
| Table S16  | Selected calculated absorption properties for <b>EuTTA</b> in gas phase.              | 20 |
| Figure S19 | Converged active space of <b>Euphen</b> in MeOH.                                      | 21 |
| Table S17  | Selected calculated absorption properties for <b>Euphen</b> in MeOH.                  | 21 |
| Figure S20 | Converged active space of <b>EuTTA</b> in MeOH.                                       | 22 |
| Table S18  | Selected calculated absorption properties for <b>EuTTA</b> in MeOH.                   | 22 |

## Part I Instrumentation

### A. Materials

$\text{EuCl}_3 \cdot 6\text{H}_2\text{O}$  and  $\text{Eu}(\text{NO}_3)_3 \cdot 6\text{H}_2\text{O}$  were purchased from Sigma-Aldrich or TCI (all  $\geq 99.99\%$  trace metals basis) and used without further purification. All organic chemicals were purchased from TCI or Energy Chemical with 98% purity and used without further purification.

### B. Syntheses of complexes

#### Synthesis of $\text{Eu}(\text{phen})_2(\text{NO}_3)_3$ complexes (Euphen)

The  $\text{Eu}(\text{phen})_2(\text{NO}_3)_3$  samples were synthesized by the literature method.<sup>1</sup> Briefly, a solution of 1,10-phenanthroline (85.9 mg, 2 mmol) in MeCN (50 mL) was added to a solution of  $\text{Eu}(\text{NO}_3)_3$  (1 mmol) in MeCN (25 mL). The mixture was left undisturbed for 1 week; white needle-shaped crystals were obtained. These were filtered, washed several times with MeCN, and dried under vacuum.

$\text{Eu}(\text{phen})_2(\text{NO}_3)_3$ : Yield: 84%; Elemental analysis: found (%): C 40.94; H 2.74; N 14.34. calcd. (%): C 41.28; H 2.31; N 14.04.

#### Synthesis of $\text{Eu}(\text{TTA})_3\text{phen}$ complexes (EuTTAphen)

The  $\text{Eu}(\text{TTA})_3\text{phen}$  samples were synthesized by the literature method.<sup>2</sup> Typically, TTA (3 mmol) and phen (1 mmol) were dissolved in 15 mL ethanol in a flask, with stirring at room temperature. Then, the pH of the solution was adjusted to 7.0 by the addition of NaOH solution (1.0 M). After that, 1 mmol of  $\text{EuCl}_3$  solution in 5.0 mL of deionized water were then added into the above mixture at 60 °C with vigorous stirring for 1.0 h to ensure a complete precipitation. The precipitate was finally filtered, washed repeatedly with ethanol and water, and dried overnight under vacuum.

$\text{Eu}(\text{TTA})_3\text{phen}$ : Yield: 57%; Elemental analysis: found (%): C 46.27; H 2.25; N 2.82. calcd. (%): C 43.43; H 2.02; N 2.81. HRMS (ESI) calcd for  $\text{C}_{24}\text{H}_{12}\text{EuF}_9\text{NaO}_6\text{S}_3^+$  [ $\text{Eu}(\text{TTA})_3+\text{Na}$ ]<sup>+</sup> 838.8757, found 838.8754. HRMS (ESI) calcd for  $\text{C}_{25}\text{H}_{13}\text{EuF}_9\text{NaO}_8\text{S}_3^+$  [ $\text{Eu}(\text{TTA})_3+\text{COOH}$ ]<sup>+</sup> 860.8847, found 860.8826.

### C. Instruments

The ultraviolet-visible absorption spectra were measured using a thin film in Nujol in the range 200-800 nm by a HP Agilent UV-8453 Spectrophotometer. Solution spectra were measured in 1 cm quartz cuvettes.

### D. Calculations

Calculations were performed using Orca version 4.2.1<sup>3, 4</sup> and accessories, together with the use of Avogadro.<sup>5, 6</sup> Various functionals as listed in Table S1 were employed with basis sets such as 6-31+G(d)<sup>7, 8</sup> and def2-TZVP with the Stuttgart in-core effective core potentials<sup>9</sup> and basis sets for the lanthanide ions.<sup>10, 11</sup> In all optimizations the Grimme dispersion correction was used in the calculations.<sup>12, 13</sup> In ORCA, the integration grid was usually set to 6 (Lebedev 590 points) with the final grid 7 (Lebedev 770 points). The nature of the optimized structures were checked with frequency calculations. The cases where repeated optimizations still gave an imaginary frequency is listed in Table S2. The simulated absorption spectra employed the bandwidth of 3000  $\text{cm}^{-1}$ .

Complete active space self-consistent field (CASSCF) calculations<sup>14</sup> utilized the natural orbitals from MP2 calculations, which in turn utilized optimized structures. Several trials were

conducted to find the optimum active space. N-Electron Valence State Perturbation Theory (NEVPT2) correction was applied to the CASSCF wavefunctions.<sup>15</sup> Solvent effects were taken into account by the Conductor-like Polarizable Continuum Model (CPCM) model<sup>16, 17</sup> in ORCA.

**Table S1.** The percentage of HF exchange in the respective DFT functionals.

| DFT Functional | Percentage of HF exchange (%) |
|----------------|-------------------------------|
| B3LYP          | 20                            |
| PBE0           | 25                            |
| PBE            | 0                             |
| M06            | 27                            |
| M062X          | 54                            |

## Part II. Results

**Table S2.** The optimization of structures of **Euphen** and **EuTTA** as assessed by normal mode calculations.

|               | Solvation Phase | No. of Imaginary Frequencies | Magnitude of Imaginary Frequency (cm <sup>-1</sup> ) |
|---------------|-----------------|------------------------------|------------------------------------------------------|
| <b>Euphen</b> | Gas phase       | 0                            | –                                                    |
|               | MeOH            | 0                            | –                                                    |
| <b>EuTTA</b>  | Gas phase       | 0                            | –                                                    |
|               | MeOH            | 1                            | –18.94                                               |

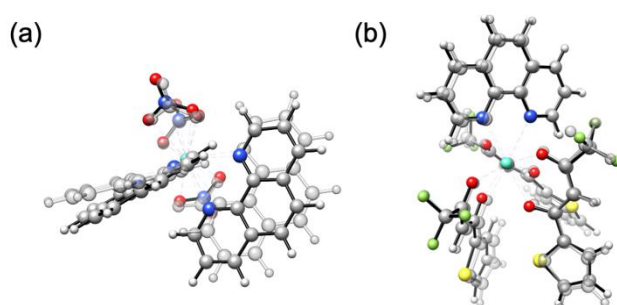

**Figure S1.** The overlaid optimized structures of (a) **Euphen** and (b) **EuTTA** in MeOH (opaque) with those in the gaseous phase (semi-transparent).

## Euphen (gas)

B3LYP

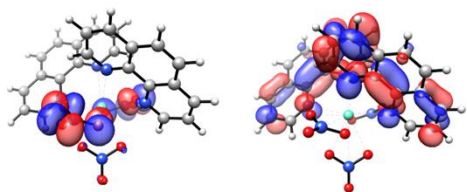

PBE0

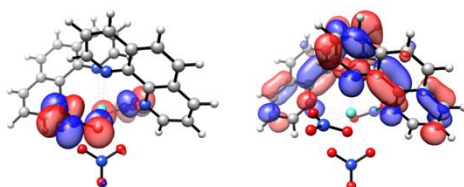

PBE

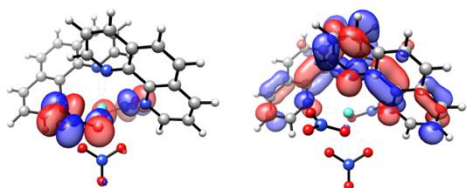

M06

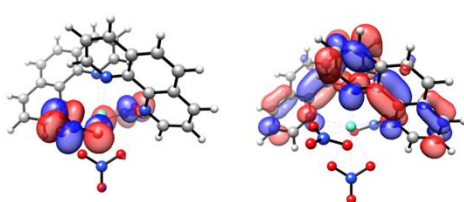

M062X

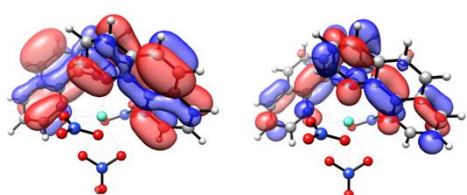

$\omega$ B97M

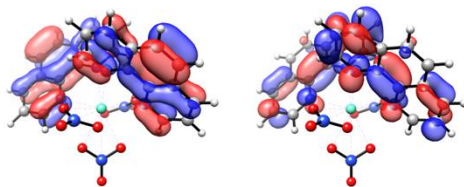

PWPB95

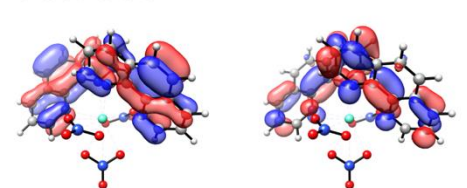

HF

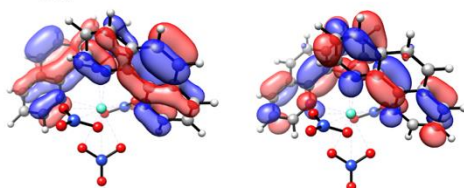

MP2

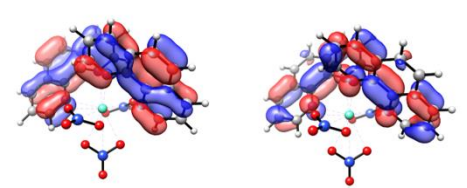

HOMO

LUMO

HOMO

LUMO

**Figure S2.** The frontier molecular orbitals of **Euphen** computed in the gas phase using various functionals as indicated.

**Table S3.** The HOMO, LUMO and the energy gap in eV for **Euphen** computed using different functionals in the gas phase.

| <b>Functionals</b> | <b>HOMO (eV)</b> | <b>LUMO (eV)</b> | <b>HOMO – LUMO (eV)</b> |
|--------------------|------------------|------------------|-------------------------|
| B3LYP              | -6.9038          | -2.5466          | 4.3572                  |
| PBE0               | -7.2556          | -2.5033          | 4.7523                  |
| PBE                | -5.4587          | -3.2728          | 2.1859                  |
| M06                | -8.4701          | -1.8005          | 6.6696                  |
| M062X              | -7.3923          | -2.5114          | 4.8809                  |
| WB97M              | -9.3757          | -0.6449          | 8.7308                  |
| PWPB95             | -7.9782          | -1.4615          | 6.5167                  |
| HF                 | -9.0117          | 0.8789           | 9.8906                  |
| MP2                | -8.9576          | 0.7562           | 9.7138                  |

## Euphen (MeOH)

B3LYP

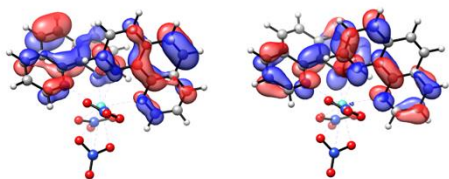

PBE0

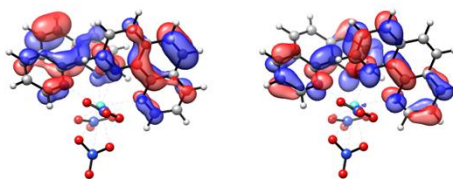

PBE

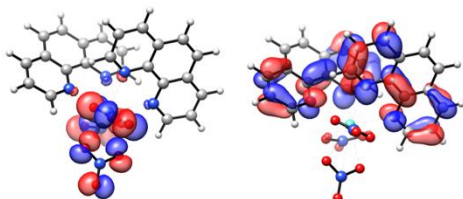

M06

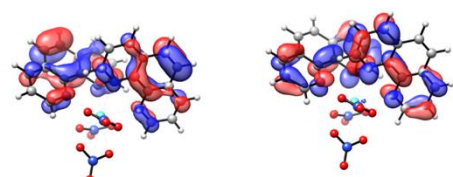

M062X

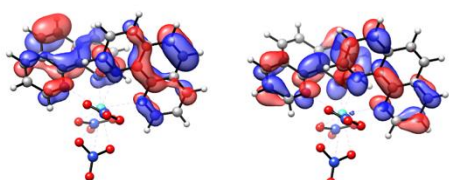

$\omega$ B97M

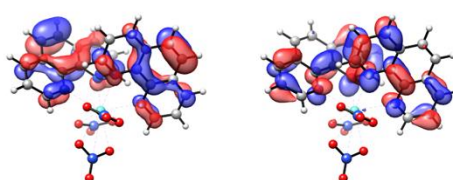

PWPB95

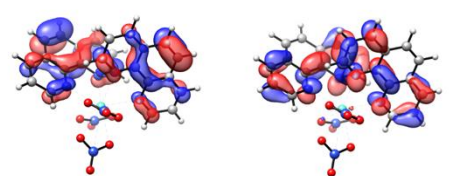

HF

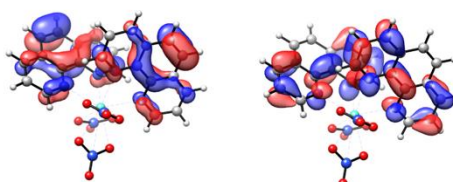

MP2

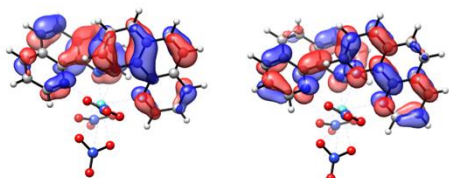

HOMO

LUMO

HOMO

LUMO

**Figure S3.** The frontier molecular orbitals of **Euphen** computed in MeOH applying the CPCM method using various functionals as indicated.

**Table S4.** The HOMO, LUMO and the energy gap in eV for **Euphen** computed using different functionals in MeOH. The band gap is over-estimated in HF and MP2 whereas it is underestimated for PBE.

| Functionals | HOMO (eV) | LUMO (eV) | HOMO – LUMO (eV) |
|-------------|-----------|-----------|------------------|
| B3LYP       | -6.8675   | -2.4537   | 4.4138           |
| PBE0        | -7.2167   | -2.4505   | 4.7662           |
| PBE         | -6.2438   | -3.1919   | 3.0519           |
| M06         | -8.232    | -1.7465   | 6.4855           |
| M062X       | -7.2103   | -2.4231   | 4.7872           |
| WB97M       | -9.1436   | -0.5739   | 8.5697           |
| PWPB95      | -7.7543   | -1.4163   | 6.3380           |
| HF          | -8.822    | 0.9026    | 9.7246           |
| MP2         | -8.7422   | 0.8325    | 9.5747           |

### EuTTA (gas)

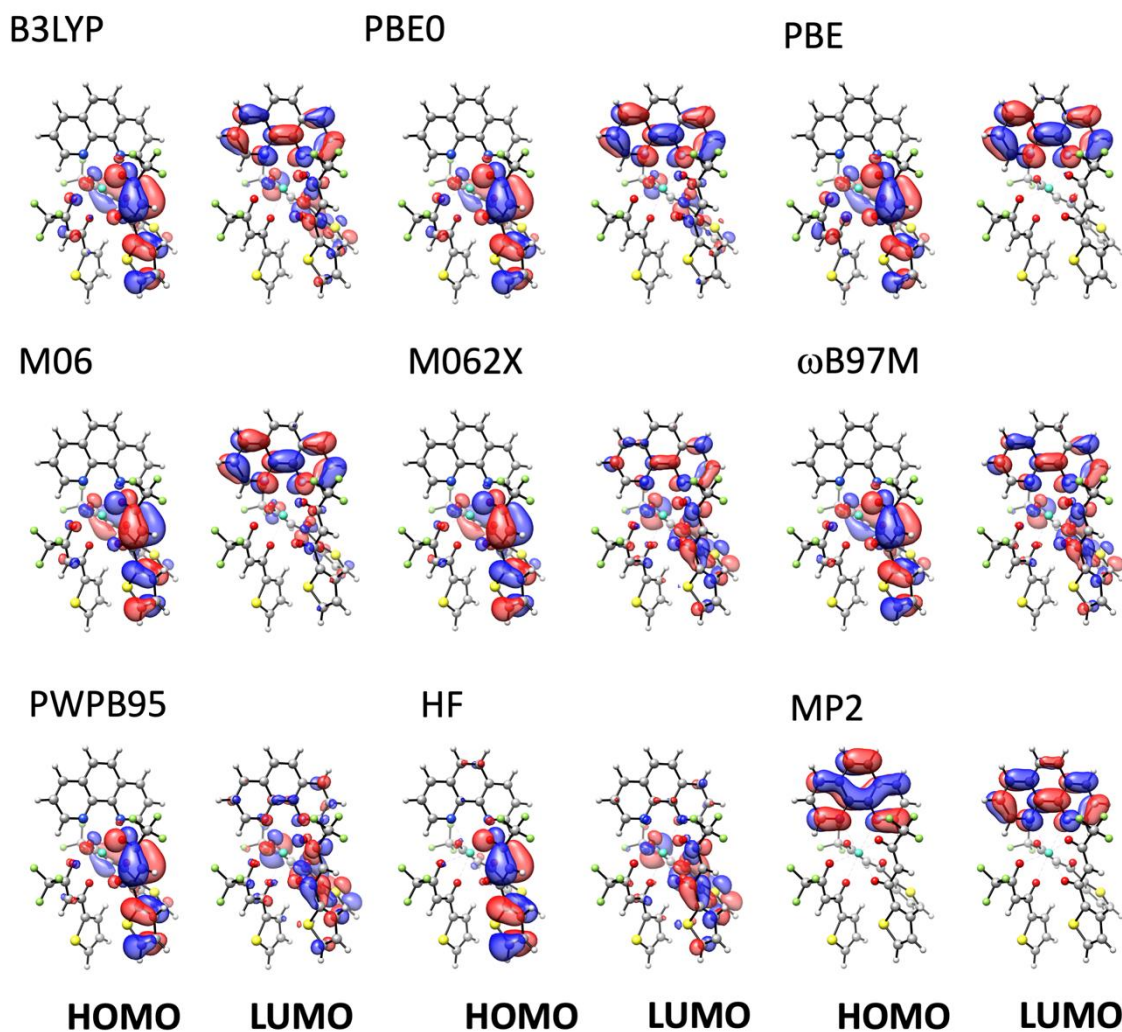

**Figure S4.** The frontier molecular orbitals of EuTTA computed in the gas phase using various functionals as indicated.



**Table S5.** The HOMO, LUMO and the energy gap in eV for **EuTTA** computed using different functionals in the gas phase.

| Functionals | HOMO (eV) | LUMO (eV) | HOMO – LUMO (eV) |
|-------------|-----------|-----------|------------------|
| B3LYP       | -6.1675   | -2.2943   | 3.8732           |
| PBE0        | -6.4645   | -2.2588   | 4.2057           |
| PBE         | -5.4526   | -3.0641   | 2.3885           |
| M06         | -7.5668   | -1.5581   | 6.0087           |
| M062X       | -6.5648   | -2.2200   | 4.3448           |
| WB97M       | -8.5567   | -0.4065   | 8.1502           |
| PWPB95      | -7.1910   | -1.2361   | 5.9549           |
| HF          | -8.6515   | 1.2113    | 9.8628           |
| MP2         | -8.5972   | 1.0743    | 9.6715           |

### EuTTA (MeOH)

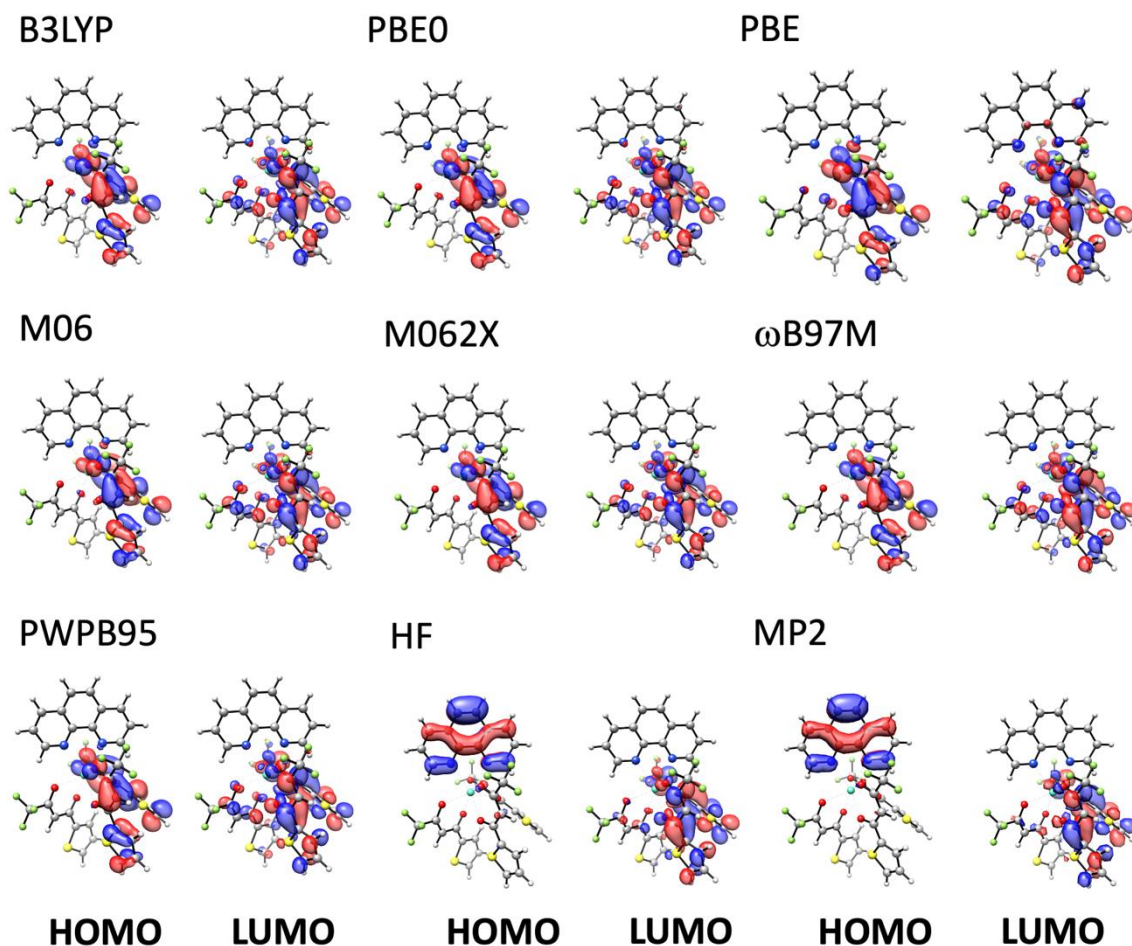

**Figure S5.** The frontier molecular orbitals of **EuTTA** computed in MeOH applying the CPCM method using various functionals as indicated.

**Table S6.** The HOMO, LUMO and the energy gap in eV for **EuTTA** computed using different functionals in the MeOH.

| Functionals | HOMO (eV) | LUMO (eV) | HOMO – LUMO (eV) |
|-------------|-----------|-----------|------------------|
| B3LYP       | -6.2678   | -2.3411   | 3.9267           |
| PBE0        | -6.6101   | -2.3276   | 4.2825           |
| PBE         | -5.581    | -3.0061   | 2.5749           |
| M06         | -7.7056   | -1.6641   | 6.0415           |
| M062X       | -6.7097   | -2.2932   | 4.4165           |
| WB97M       | -8.6680   | -0.4796   | 8.1884           |
| PWPB95      | -7.3123   | -1.3277   | 5.9846           |
| HF          | -8.5602   | 1.0426    | 9.6028           |
| MP2         | -8.5603   | 1.0426    | 9.6029           |

### PBE0/def2-TZVP

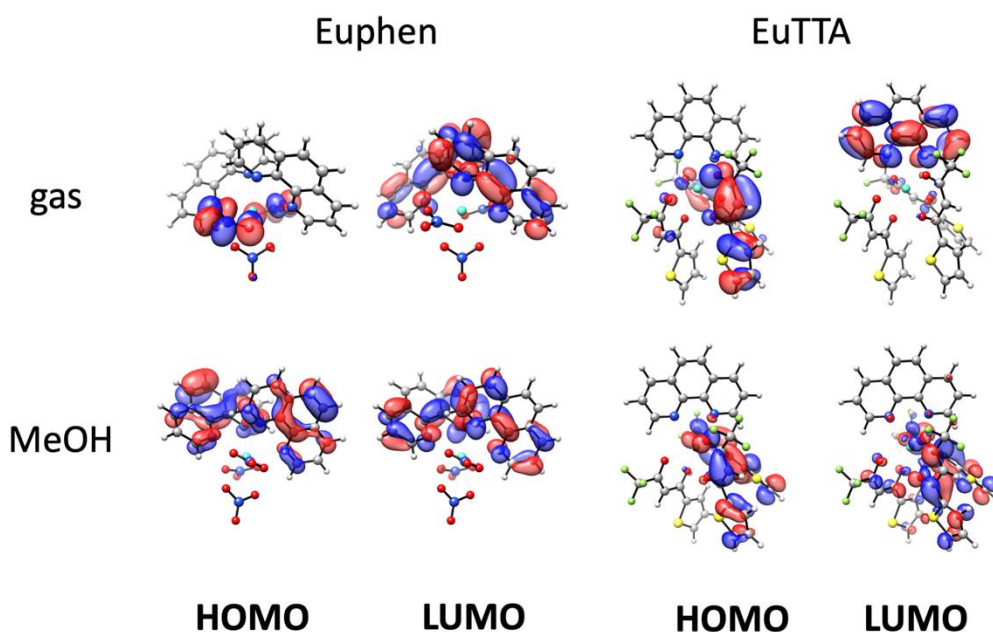

**Figure S6.** The frontier molecular orbitals of **Euphen** and **EuTTA** computed in the gas phase and MeOH at PBE0-D3BJ/def2-TZVP level of theory. A similar graphical representation of the HOMO and LUMO can be observed as in PBE0-D3ZERO/6-31+G(d).

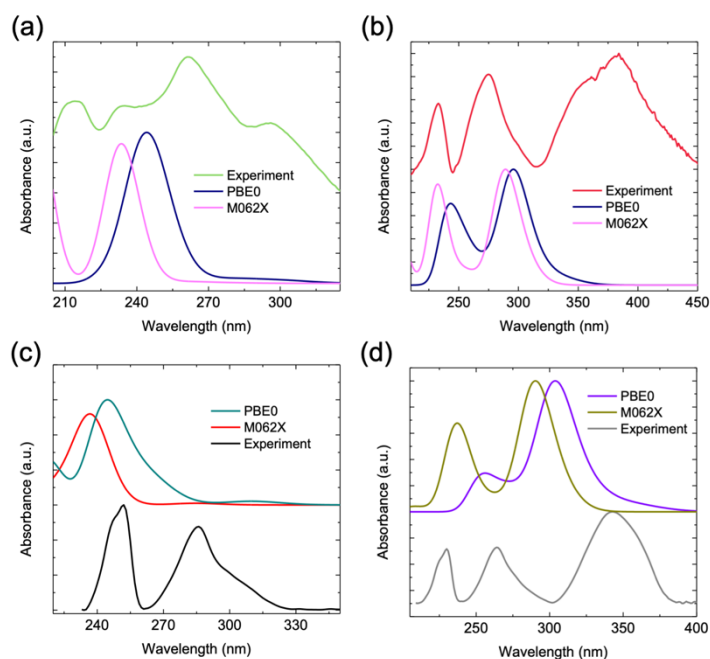

**Figure S7.** The comparison of experimental absorption spectra of (a) **Euphen** and (b) **EuTTA** to the TD-DFT absorption spectra computed using PBE0 and M062X in the gas phase and (c) **Euphen** and (d) **EuTTA** in MeOH.

## Euphen (gas)

### PBE0

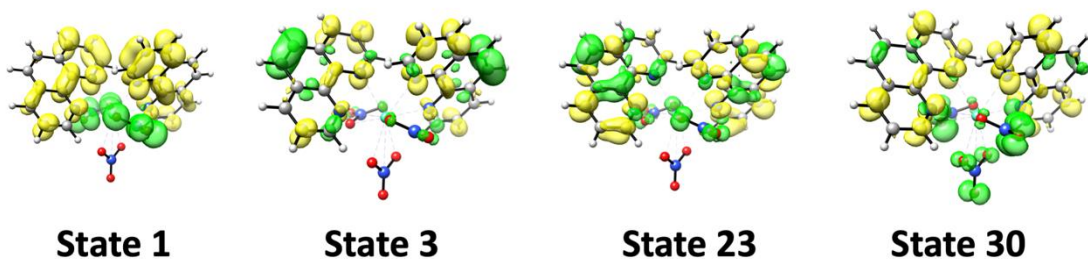

**Figure S8.** Selected graphical orbital transitions of **Euphen** in gas phase computed using TD-DFT with PBE0-D3BJ/6-31+G(d) level of theory. The green colour indicates a decrease in electron density and yellow indicates an increase.

**Table S7.** Selected calculated absorption properties with the major composition of **Euphen** in the gas phase from TD-DFT with PBE0-D3BJ/6-31+G(d) level of theory.

| State | Wavelength (nm) | Oscillator Strength | Major contribution                                     |
|-------|-----------------|---------------------|--------------------------------------------------------|
| 1     | 311             | 0.00219             | HOMO → LUMO (91%)                                      |
| 3     | 301             | 0.01209             | HOMO – 1 → LUMO (40%)<br>HOMO – 2 → LUMO + 1 (19%)     |
| 23    | 264             | 0.01114             | HOMO – 4 → LUMO + 3 (42%)<br>HOMO – 1 → LUMO + 2 (26%) |
| 30    | 252             | 0.12720             | HOMO – 7 → LUMO (30%)                                  |

**Euphen (gas)**  
**M062X**

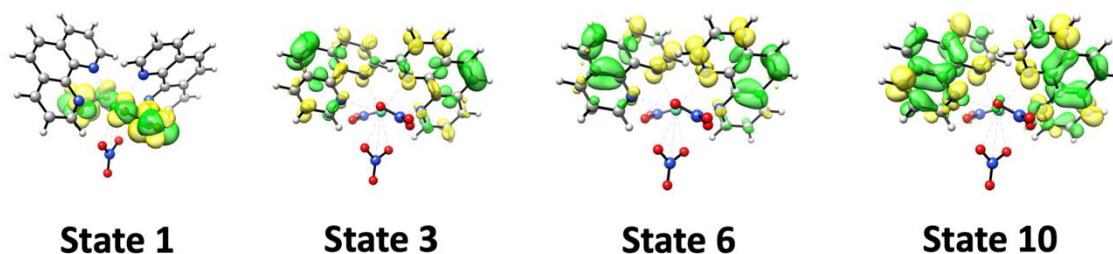

**Figure S9.** The selected graphical orbital transitions of **Euphen** in the gas phase computed using TD-DFT with M062X-D3ZERO/6-31+G(d) level of theory. The green colour indicates a decrease in electron density and yellow indicates an increase.

**Table S8.** Selected calculated absorption properties with the major composition of **Euphen** in gas phase from TD-DFT with M062X-D3ZERO/6-31+G(d) level of theory.

| State | Wavelength (nm) | Oscillator Strength | Major contribution                                                                     |
|-------|-----------------|---------------------|----------------------------------------------------------------------------------------|
| 1     | 284             | 0.00005             | HOMO – 6 → LUMO + 15 (35%)<br>HOMO – 4 → LUMO + 10 (15%)<br>HOMO – 4 → LUMO + 17 (13%) |
| 3     | 280             | 0.00400             | HOMO → LUMO (37%)<br>HOMO – 1 → LUMO + 2 (22%)                                         |
| 6     | 262             | 0.01210             | HOMO – 1 → LUMO + 2 (26%)<br>HOMO – 2 → LUMO (21%)                                     |
| 10    | 236             | 0.72235             | HOMO – 3 → LUMO (21%)<br>HOMO → LUMO + 2 (15%)                                         |

**EuTTA (gas)**  
**PBE0**

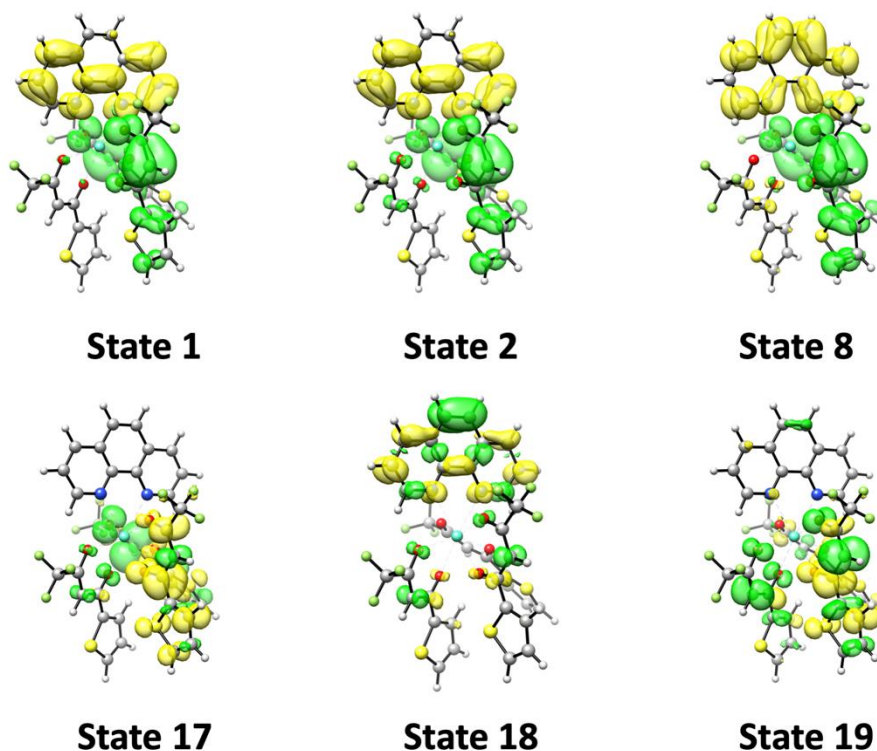

**Figure S10.** The selected graphical orbital transitions of **EuTTA** in gas phase computed using TD-DFT with PBE0-D3BJ/6-31+G(d) level of theory. The green colour indicates a decrease in electron density and yellow indicates an increase.

**Table S9.** Selected calculated absorption properties with the major composition of **EuTTA** in gas phase from TD-DFT with PBE0-D3BJ/6-31+G(d) level of theory.

| State | Wavelength (nm) | Oscillator Strength | Major contribution                                                              |
|-------|-----------------|---------------------|---------------------------------------------------------------------------------|
| 1     | 347             | 0.00346             | HOMO → LUMO (83%)                                                               |
| 2     | 341             | 0.03180             | HOMO – 1 → LUMO (76%)                                                           |
| 8     | 325             | 0.01817             | HOMO – 1 → LUMO + 2 (50%)<br>HOMO → LUMO + 2 (20%)<br>HOMO – 1 → LUMO + 1 (15%) |
| 17    | 305             | 0.12278             | HOMO – 1 → LUMO + 4 (57%)<br>HOMO – 1 → LUMO + 3 (15%)                          |
| 18    | 298             | 0.21862             | HOMO – 5 → LUMO (48%)                                                           |
| 19    | 294             | 0.76827             | HOMO → LUMO + 4 (28%)<br>HOMO – 2 → LUMO + 4 (18%)                              |

**EuTTA (gas)**  
**M062X**

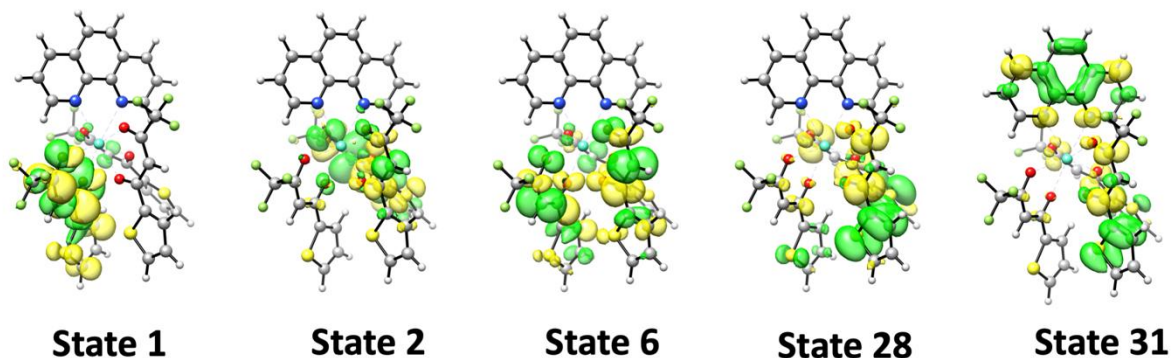

**Figure S11.** Selected graphical orbital transitions of **EuTTA** in gas phase computed using TD-DFT with M062X-D3ZERO/6-31+G(d) level of theory. The green colour indicates a decrease in electron density and yellow indicates an increase.

**Table S10.** Selected calculated absorption properties with the major composition of **EuTTA** in gas phase from TD-DFT with M062X-D3ZERO/6-31+G(d) level of theory.

| State | Wavelength (nm) | Oscillator Strength | Major contribution                                                               |
|-------|-----------------|---------------------|----------------------------------------------------------------------------------|
| 1     | 309             | 0.01169             | HOMO – 11 → LUMO + 3 (25%)<br>HOMO – 12 → LUMO + 3 (19%)                         |
| 2     | 305             | 0.19555             | HOMO → LUMO (27%)<br>HOMO – 1 → LUMO (24%)                                       |
| 6     | 288             | 1.29232             | HOMO – 4 → LUMO + 1 (42%)<br>HOMO – 9 → LUMO + 2 (25%)                           |
| 28    | 237             | 0.29480             | HOMO – 8 → LUMO (26%)                                                            |
| 31    | 232             | 0.62347             | HOMO – 10 → LUMO (11%)<br>HOMO – 9 → LUMO + 1 (11%)<br>HOMO – 4 → LUMO + 2 (11%) |

**Euphen (MeOH)  
PBE0**

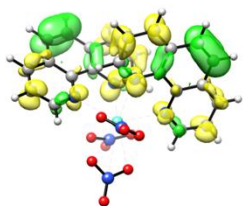

**State 1**

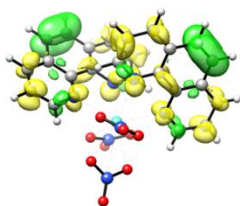

**State 2**

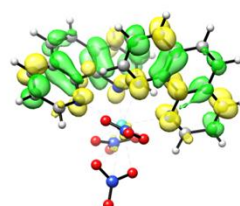

**State 12**

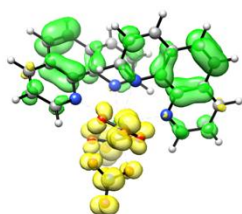

**State 20**

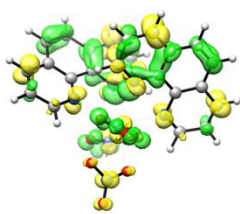

**State 23**

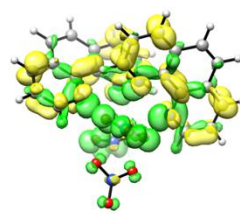

**State 24**

**Figure S12.** The selected graphical orbital transitions of **Euphen** in MeOH computed using TD-DFT with PBE0-D3BJ/6-31+G(d) level of theory. The green colour indicates a decrease in electron density and yellow indicates an increase.

**Table S11.** Selected calculated absorption properties with the major composition of **Euphen** in MeOH from TD-DFT with PBE0-D3BJ/6-31+G(d) level of theory.

| State | Wavelength (nm) | Oscillator Strength | Major contribution                                     |
|-------|-----------------|---------------------|--------------------------------------------------------|
| 1     | 312             | 0.00875             | HOMO → LUMO (78%)                                      |
| 2     | 310             | 0.02464             | HOMO – 1 → LUMO (74%)                                  |
| 12    | 268             | 0.09147             | HOMO – 3 → LUMO + 1 (39%)<br>HOMO – 2 → LUMO (35%)     |
| 20    | 255             | 0.10695             | HOMO – 1 → LUMO + 4 (39%)<br>HOMO – 3 → LUMO + 2 (18%) |
| 23    | 243             | 0.40685             | HOMO – 7 → LUMO (16%)<br>HOMO – 3 → LUMO + 1 (15%)     |
| 24    | 244             | 0.15873             | HOMO – 7 → LUMO (38%)<br>HOMO – 5 → LUMO (18%)         |

**Euphen (MeOH)**  
**M062X**

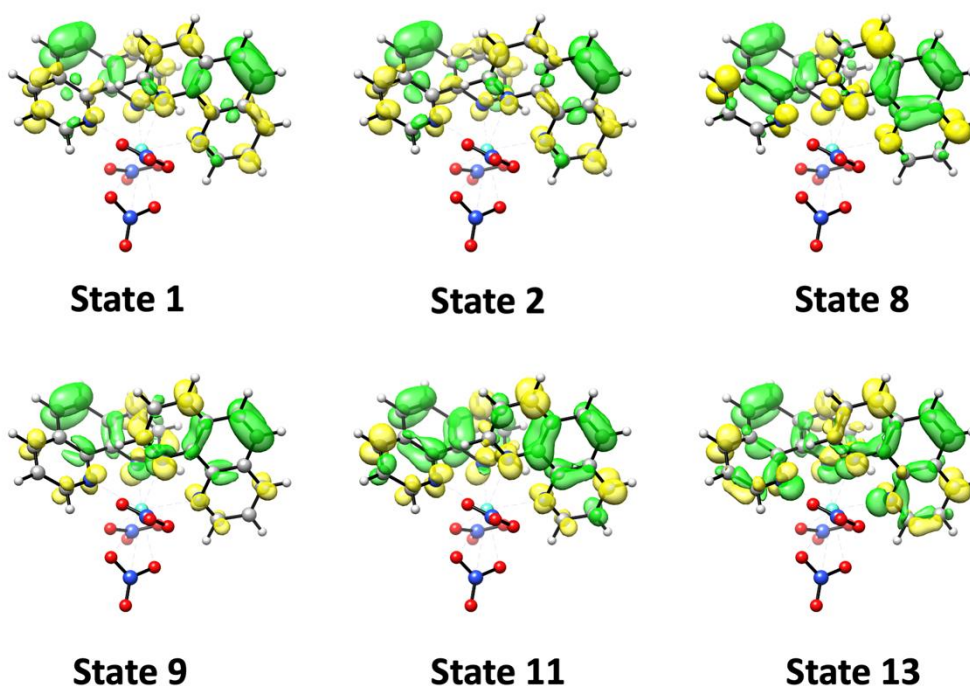

**Figure S13.** The selected graphical orbital transitions of **Euphen** in MeOH computed using TD-DFT with M062X-D3ZERO/6-31+G(d) level of theory. The green colour indicates a decrease in electron density and yellow indicates an increase.

**Table S12.** Selected calculated absorption properties with the major composition of **Euphen** in MeOH from TD-DFT with M062X-D3ZERO/6-31+G(d) level of theory.

| State | Wavelength (nm) | Oscillator Strength | Major contribution                             |
|-------|-----------------|---------------------|------------------------------------------------|
| 1     | 286             | 0.00548             | HOMO → LUMO (49%)<br>HOMO - 1 → LUMO + 1 (23%) |
| 2     | 284             | 0.01672             | HOMO - 1 → LUMO (43%)<br>HOMO → LUMO + 1 (26%) |
| 8     | 243             | 0.22826             | HOMO → LUMO (22%)<br>HOMO - 1 → LUMO + 1 (21%) |
| 9     | 240             | 0.11777             | HOMO - 1 → LUMO (42%)                          |
| 11    | 237             | 0.76593             | HOMO - 2 → LUMO (38%)<br>HOMO → LUMO + 1 (17%) |
| 13    | 230             | 0.10086             | HOMO → LUMO + 1 (20%)<br>HOMO → LUMO + 3 (20%) |



**EuTTA (MeOH)**  
**PBE0**

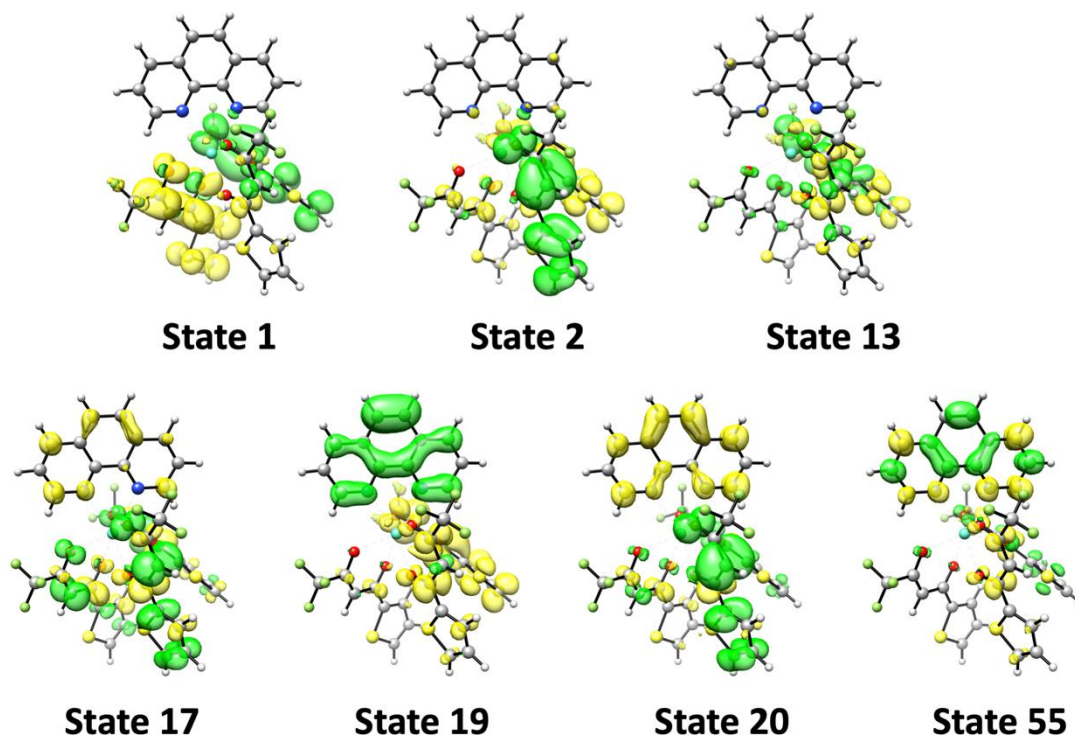

**Figure S14.** Selected graphical orbital transitions of **EuTTA** in MeOH computed using TD-DFT with PBE0-D3BJ/6-31+G(d) level of theory. The green colour indicates a decrease in electron density and yellow indicates an increase.

**Table S13.** Selected calculated absorption properties with the major composition of **EuTTA** in MeOH from TD-DFT with PBE0-D3BJ/6-31+G(d) level of theory.

| State | Wavelength (nm) | Oscillator Strength | Major contribution                                                                  |
|-------|-----------------|---------------------|-------------------------------------------------------------------------------------|
| 1     | 374             | 0.00857             | HOMO → LUMO (41%)<br>HOMO → LUMO + 1 (38%)                                          |
| 2     | 358             | 0.01759             | HOMO - 1 → LUMO (37%)<br>HOMO → LUMO (34%)                                          |
| 13    | 308             | 0.10109             | HOMO - 13 → LUMO (15%)<br>HOMO - 1 → LUMO + 2 (11%)<br>HOMO - 1 → LUMO + 3 (10%)    |
| 17    | 300             | 0.57422             | HOMO - 1 → LUMO + 4 (16%)<br>HOMO - 2 → LUMO + 1 (13%)                              |
| 19    | 327             | 0.10685             | HOMO - 3 → LUMO + 1 (72%)                                                           |
| 20    | 303             | 0.27895             | HOMO - 1 → LUMO + 4 (47%)                                                           |
| 55    | 253             | 0.12271             | HOMO - 8 → LUMO + 4 (25%)<br>HOMO - 3 → LUMO + 5 (16%)<br>HOMO - 7 → LUMO + 4 (13%) |

**EuTTA (MeOH)**  
**M062X**

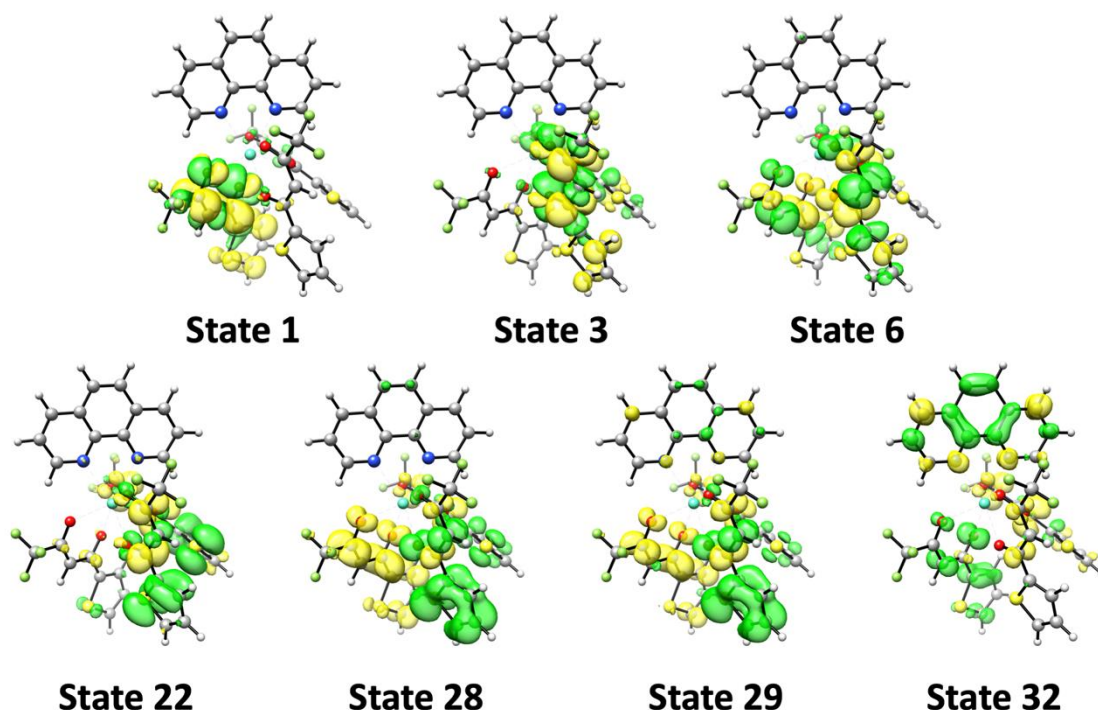

**Figure S15.** Selected graphical orbital transitions of **EuTTA** in MeOH computed using TD-DFT with M062X-D3ZERO/6-31+G(d) level of theory. The green colour indicates a decrease in electron density and yellow indicates an increase.

**Table S14.** Selected calculated absorption properties with the major composition of **EuTTA** in MeOH from TD-DFT with M062X-D3ZERO/6-31+G(d) level of theory.

| State | Wavelength (nm) | Oscillator Strength | Major contribution                                                          |
|-------|-----------------|---------------------|-----------------------------------------------------------------------------|
| 1     | 312             | 0.00806             | HOMO – 12 → LUMO + 1 (25%)<br>HOMO – 11 → LUMO + 1 (19%)                    |
| 3     | 306             | 0.14216             | HOMO → LUMO (24%)<br>HOMO – 11 → LUMO (14%)                                 |
| 6     | 289             | 1.36629             | HOMO – 1 → LUMO (34%)<br>HOMO – 2 → LUMO + 1 (23%)<br>HOMO → LUMO + 2 (12%) |
| 22    | 245             | 0.18150             | HOMO – 9 → LUMO (24%)<br>HOMO – 8 → LUMO (15%)                              |
| 28    | 241             | 0.14163             | HOMO – 4 → LUMO + 1 (26%)                                                   |
| 29    | 237             | 0.18314             | HOMO – 4 → LUMO + 1 (27%)                                                   |
| 32    | 233             | 0.31221             | HOMO – 7 → LUMO (12%)                                                       |

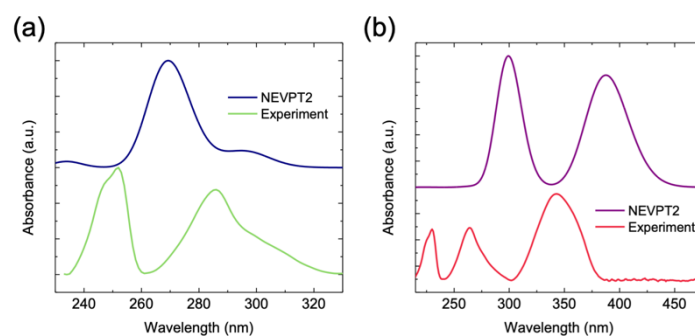

**Figure S16.** The comparison of experimental absorption spectra of (a) **Euphen** and (b) **EuTTA** to the CASSCF/NEVPT2 (4,5) absorption spectra in MeOH.

## Euphen (gas) CASSCF Active Space

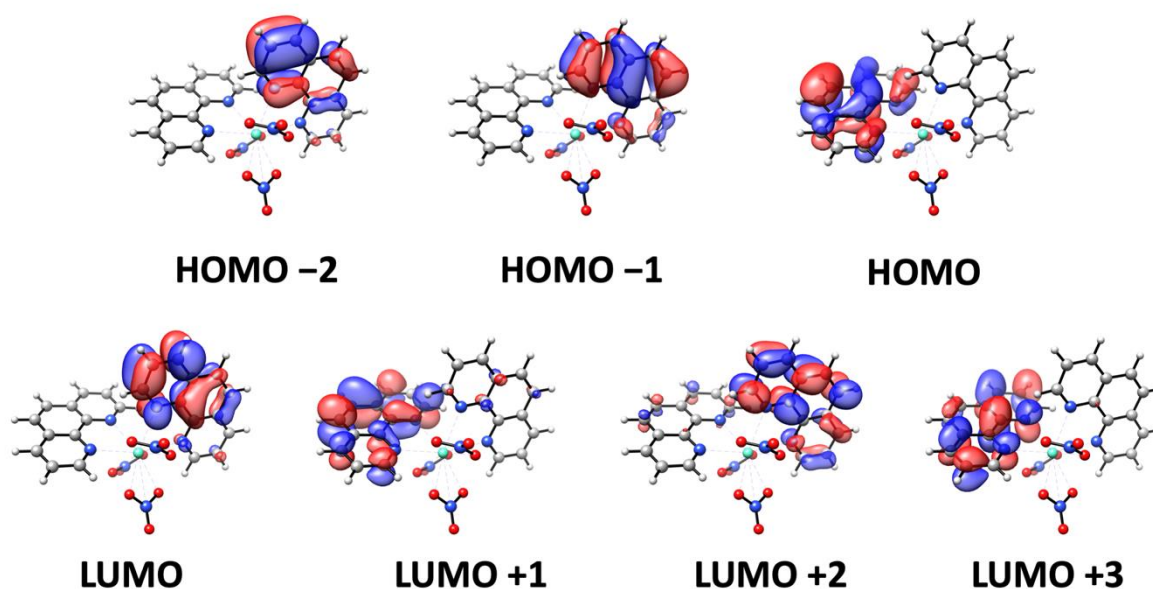

**Figure S17.** The active space of **Euphen** in gas phase computed using CASSCF level of theory after convergence.

**Table S15.** Selected calculated absorption properties with the major composition of **Euphen** in gas phase CASSCF with NEVPT2 corrections.

| State | Wavelength (nm) | Oscillator Strength | Major contribution                                                                                       |
|-------|-----------------|---------------------|----------------------------------------------------------------------------------------------------------|
| 2     | 297             | 0.31462             | HOMO → LUMO + 3 (81%)                                                                                    |
| 3     | 263             | 0.92075             | HOMO → LUMO + 1 (77%)                                                                                    |
| 6     | 217             | 1.13159             | HOMO - 2 → LUMO (32%)<br>HOMO - 2 → LUMO + 2 (28%)<br>HOMO - 1 → LUMO (14%)                              |
| 9     | 216             | 0.56198             | HOMO - 2 → LUMO (25%)<br>HOMO - 1 → LUMO + 2 (23%)<br>HOMO - 1 → LUMO (12%)<br>HOMO - 1 → LUMO + 2 (11%) |

**EuT3 (gas)**  
**CASSCF Active Space**

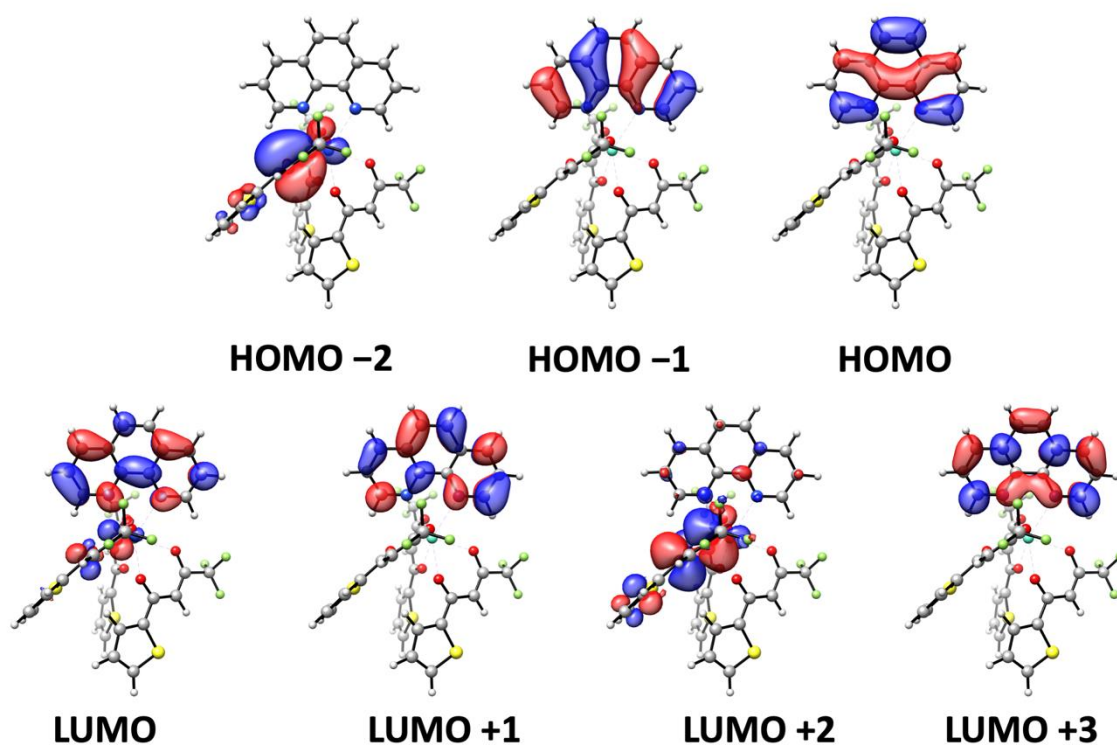

**Figure S18.** The active space of EuTTA in gas phase computed using CASSCF level of theory after convergence.

**Table S16.** Selected calculated absorption properties with the major composition of EuTTA in gas phase CASSCF with NEVPT2 corrections.

| State | Wavelength (nm) | Oscillator Strength | Major contribution                                                                                                            |
|-------|-----------------|---------------------|-------------------------------------------------------------------------------------------------------------------------------|
| 1     | 393             | 0.25121             | HOMO - 2 → LUMO + 2 (74%)                                                                                                     |
| 2     | 255             | 1.28214             | HOMO - 1 → LUMO + 1 (20%)<br>HOMO - 1 → LUMO (17%)<br>HOMO → LUMO + 1 (14%)<br>HOMO → LUMO (14%)<br>HOMO - 1 → LUMO + 3 (12%) |
| 3     | 218             | 0.96508             | HOMO → LUMO + 3 (44%)                                                                                                         |
| 4     | 204             | 0.47910             | HOMO - 1 → LUMO + 1 (24%)<br>HOMO - 1 → LUMO + 3 (71%)                                                                        |

**Euphen (MeOH)  
CASSCF Active Space**

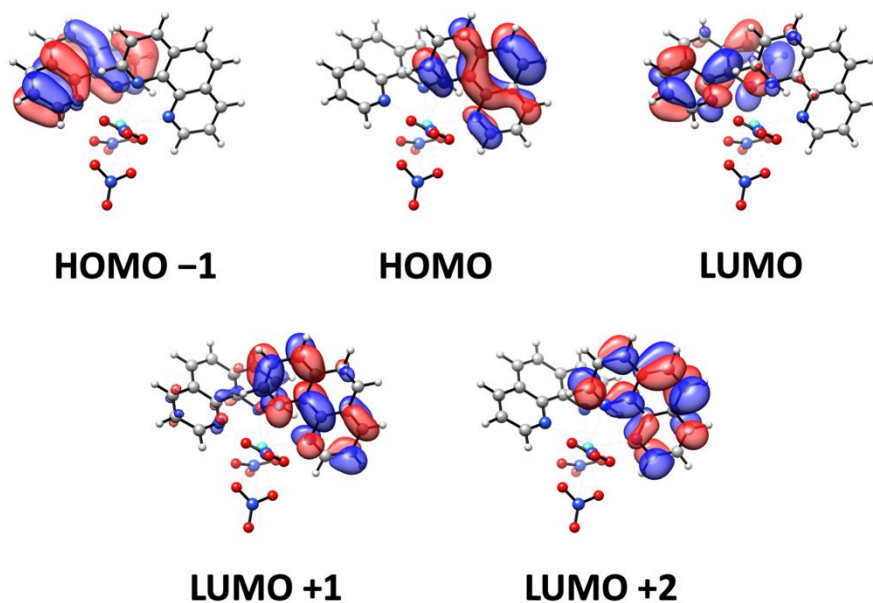

**Figure S19.** The active space of **Euphen** in MeOH computed using CASSCF level of theory after convergence.

**Table S17.** Selected calculated absorption properties with the major composition of **Euphen** in MeOH CASSCF with NEVPT2 corrections.

| State | Wavelength (nm) | Oscillator Strength | Major contribution                         |
|-------|-----------------|---------------------|--------------------------------------------|
| 1     | 313             | 0.24167             | HOMO → LUMO + 1 (79%)<br>HOMO → LUMO (17%) |
| 2     | 282             | 0.40700             | HOMO - 1 → LUMO (82%)                      |
| 3     | 272             | 1.32589             | HOMO → LUMO + 2 (82%)                      |
| 5     | 226             | 0.07288             | HOMO - 1 → LUMO + 1 (96%)                  |

**EuTTA (MeOH)**  
**CASSCF Active Space**

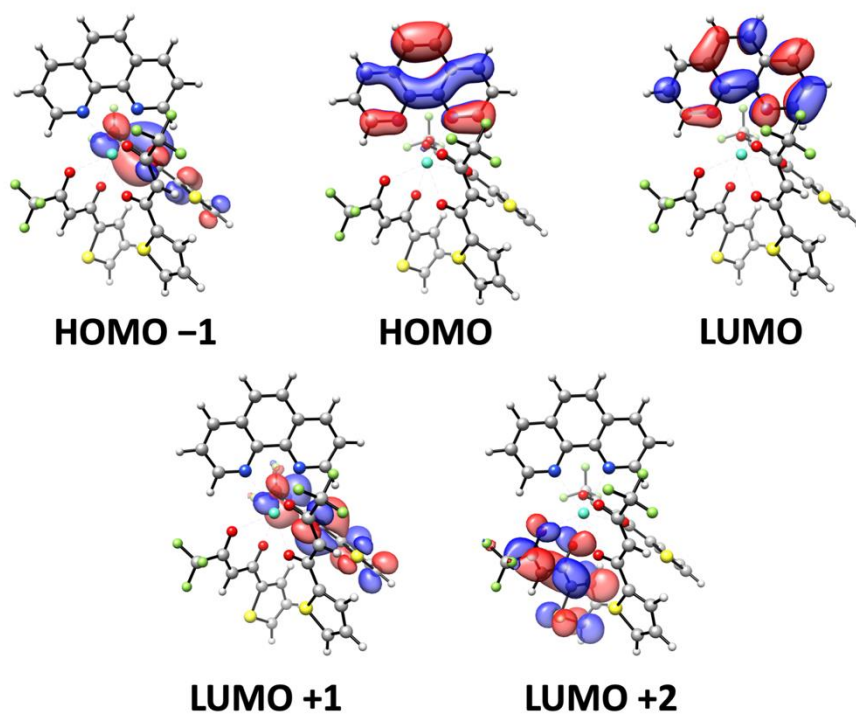

**Figure S20.** The active space of **EuTTA** in MeOH computed using CASSCF level of theory after convergence.

**Table S18.** Selected calculated absorption properties with the major composition of **EuTTA** in MeOH CASSCF with NEVPT2 corrections.

| State | Wavelength (nm) | Oscillator Strength | Major contribution        |
|-------|-----------------|---------------------|---------------------------|
| 1     | 388             | 0.44632             | HOMO - 1 → LUMO + 1 (93%) |
| 3     | 299             | 0.52275             | HOMO → LUMO (97%)         |
| 5     | 267             | 0.00381             | HOMO - 1 → LUMO (80%)     |
| 11    | 179             | 0.00971             | HOMO - 1 → LUMO (74%)     |

## References

1. Z. Pan, G. Jia, C.-K. Duan, W.-Y. Wong, W.-T. Wong and P. A. Tanner, *European Journal of Inorganic Chemistry*, 2011, **2011**, 637-646.
2. M. Meng, M. Bai, Z. Da, Y. Cui, B. Li and J. Pan, *Journal of Luminescence*, 2019, **208**, 24-32.
3. F. Neese, *WIREs Computational Molecular Science*, 2012, **2**, 73-78.
4. F. Neese, *WIREs Computational Molecular Science*, 2018, **8**, e1327.
5. M. D. Hanwell, D. E. Curtis, D. C. Lonie, T. Vandermeersch, E. Zurek and G. R. Hutchison, *Journal of Cheminformatics*, 2012, **4**, 17.
6. Avogadro: an open-source molecular builder and visualization tool. Version 1.2.0. <http://avogadro.cc/>
7. R. Ditchfield, W. J. Hehre and J. A. Pople, *The Journal of Chemical Physics*, 1971, **54**, 724-728.
8. W. J. Hehre, R. Ditchfield and J. A. Pople, *The Journal of Chemical Physics*, 1972, **56**, 2257-2261.
9. Energy-consistent Pseudopotentials of the Stuttgart/Cologne Group, available at: <http://www.tc.uni-koeln.de/PP/clickpse.en.html>.
10. M. Dolg, H. Stoll, A. Savin and H. Preuss, *Theoretica chimica acta*, 1989, **75**, 173-194.
11. D. Andrae, U. Häußermann, M. Dolg, H. Stoll and H. Preuß, *Theoretica chimica acta*, 1990, **77**, 123-141.
12. S. Grimme, J. Antony, S. Ehrlich and H. Krieg, *The Journal of Chemical Physics*, 2010, **132**, 154104.
13. S. Grimme, S. Ehrlich and L. Goerigk, *Journal of Computational Chemistry*, 2011, **32**, 1456-1465.
14. D. Aravena, M. Atanasov and F. Neese, *Inorganic Chemistry*, 2016, **55**, 4457-4469.
15. C. Angeli, R. Cimiraglia, S. Evangelisti, T. Leininger and J. P. Malrieu, *The Journal of Chemical Physics*, 2001, **114**, 10252-10264.
16. J. Tomasi, B. Mennucci and R. Cammi, *Chemical Reviews*, 2005, **105**, 2999-3094.
17. V. Barone and M. Cossi, *The Journal of Physical Chemistry A*, 1998, **102**, 1995-2001.
